# Supplementary material for: Long-term Memory Response After a Single Intramuscular Rabies Booster Vaccination 10–24 Years After Primary Immunization
Source: PubMed Central journal article supplement — J Infect Dis. 2021 Jan 27;226(6):1052–6. doi: 10.1093/infdis/jiab034 (PMC9492309; doi:10.1093/infdis/jiab034), 2021-01-27
Supplement: jiab034_suppl_supplementary_material.pdf [file jiab034_suppl_supplementary_material.pdf]

## **Supplement file**

Long-term memory response after a single intramuscular rabies booster vaccination, 10-24 years after primary immunization

Cornelis A. De Pijper, Annefleur C. Langedijk, Sanne Terryn, Steven Van Gucht, Martin P. Grobusch, Abraham Goorhuis, Cornelis Stijnis

### **Supplement content:**

1: Study participants

2: Explanation of exclusion

3: Supplement Table S1; base line characteristics for total and per group

4: Supplement Table S2; characteristics in divergent group per participant on baseline

5: Supplement Table S3; rabies antibody response after boosting a 2-dose PrEP-schedule 10-11 years before

## **Supplement file 1**

### **Study participants**

Healthy volunteers of 18 years and older were recruited if they met the inclusion criteria. All participants had received rabies PrEP at least ten years before enrolment and had never received a rabies booster immunization, or rabies immunoglobulins. Exclusion criteria were immune-deficiencies, allergies to components, pregnancy, breastfeeding, and using mefloquine or chloroquine as malaria prophylaxis. Note: Since 2020, malaria prophylaxis is no longer considered contra-indicated. After an automated search in the military medical records, potential military participants were approached for the study. Other civilian participants were identified from the travelers database of the Center for Tropical Medicine and Travel Medicine.

## **Supplement file 2**

### **Explanation of exclusion**

We excluded one 50 years old male subject. According to the medical files, he had supposedly received an administration of three IM rabies immunization 20 years before, but evidence of this vaccination was lacking, as he had lost his individual vaccination passport. He was not immunocompromised, nor had he been using immunosuppressive drugs. His titers on day 0, 3, 7 and 14, were 0.17, 0.17, 0.17 and 0.61 IU/ml, respectively. On day 28, we collected an additional sample and performed the RFFIT again, resulting in a titer of 0.61 IU/ml.

This immunogenicity data over these five time-points were suggestive of a primary response, rather than a secondary or booster response. Therefore, we concluded that the IM booster immunization probably was his first rabies immunization ever; so he was excluded from the study. To prove this hypothesis, it would have been ideal to check for a secondary response with a new booster immunization after 1 year, however, this is beyond the scope of the research reported here.

**Supplement Table S1: base line characteristics for total and per group**

| Group             | Subjects (n) | Age in years<br>median [range] | Sex (n)                | Interval in years<br>median [range] | Availability of immunogenicity data (n) |                    |                                 |
|-------------------|--------------|--------------------------------|------------------------|-------------------------------------|-----------------------------------------|--------------------|---------------------------------|
|                   |              |                                |                        |                                     | Day                                     | % $\geq 0.5$ IU/ml | GMT, 95% CI, range <sup>a</sup> |
| <b>TOTAL</b>      | 28           | 42.5<br>[30-63]                | Male: 18<br>Female: 10 | 11<br>[10-24]                       | 0                                       | 28                 | 24                              |
|                   |              |                                |                        |                                     | 3                                       | 28                 | 23                              |
|                   |              |                                |                        |                                     | 7                                       | 28                 | 28                              |
|                   |              |                                |                        |                                     | 14                                      | 28                 | 28                              |
| <b>3-IM Group</b> | 9            | 50<br>[43-57]                  | Male: 9<br>Female: 0   | 23<br>[14-24]                       | 0                                       | 9                  | 9                               |
|                   |              |                                |                        |                                     | 3                                       | 9                  | 9                               |
|                   |              |                                |                        |                                     | 7                                       | 9                  | 9                               |
|                   |              |                                |                        |                                     | 14                                      | 9                  | 9                               |
| <b>3-ID Group</b> | 10           | 35<br>[30-63]                  | Male: 3<br>Female: 7   | 10<br>[10-12]                       | 0                                       | 10                 | 9                               |
|                   |              |                                |                        |                                     | 3                                       | 10                 | 9                               |
|                   |              |                                |                        |                                     | 7                                       | 10                 | 10                              |
|                   |              |                                |                        |                                     | 14                                      | 10                 | 10                              |
| <b>DIV Group</b>  | 9            | 39<br>[33-52]                  | Male: 6<br>Female: 3   | 10<br>[10-12]                       | 0                                       | 9                  | 6                               |
|                   |              |                                |                        |                                     | 3                                       | 9                  | 5                               |
|                   |              |                                |                        |                                     | 7                                       | 9                  | 9                               |
|                   |              |                                |                        |                                     | 14                                      | 9                  | 9                               |

<sup>a</sup> GMT, 95% CI and range in subjects with adequate ( $\geq 0.5$  IU/ml) titer

**Abbreviations:** CI: confidence interval; DIV: divergent; GMT: geometric mean titer; ID: intradermal; IM: intramuscular

**Supplement Table S2: Characteristics in divergent group per participant on baseline**

| <b>Divergent PrEP-schedule</b> | <b>Days of immunization</b> | <b>ROA</b>     | <b>Interval (in years)</b> | <b>Sex</b> | <b>Age (in years)</b> |
|--------------------------------|-----------------------------|----------------|----------------------------|------------|-----------------------|
| 3 dose                         | 0 – 7 – 36                  | ID (0.1 ml)    | 10                         | M          | 52                    |
|                                | 0 – 11 – 21                 | ID (0.1 ml)    | 12                         | M          | 36                    |
|                                | 0 – 12 – 28                 | ID (0.1 ml)    | 11                         | M          | 33                    |
| 2 dose                         | 0 – 7                       | ID (0.1 ml)    | 11                         | M          | 34                    |
|                                | 0 – 7                       | IM (full dose) | 10                         | M          | 34                    |
|                                | 0 – 7                       | IM (full dose) | 11                         | F          | 42                    |
|                                | 0 – 8                       | IM (full dose) | 10                         | F          | 46                    |
|                                | 0 – 11                      | IM (full dose) | 10                         | M          | 39                    |
|                                | 0 – 11                      | IM (full dose) | 10                         | F          | 41                    |
|                                |                             |                |                            |            |                       |

**Abbreviations:** ID: intradermal; IM intramuscular; PrEP: pre-exposure prophylaxis; ROA: route of administration

**Supplement Table S3: Rabies antibody response after boosting a 2-dose PrEP-schedule 10-11 years before; immunogenicity data per time-point**

| 2-dose | Time-point | ≥0.5 IU/ml | GMT (95% CI) <sup>a</sup> | Range <sup>a</sup> | ≥ 3 IU/ml | ≥ 10 IU/ml | Fold increase |
|--------|------------|------------|---------------------------|--------------------|-----------|------------|---------------|
|        | day 0      | 83%        | 2.33 (0.31 - 3.86)        | 0.50 - 5.87        | 17%       | 0%         | 1.00          |
|        | day 3      | 67%        | 1.81 (0.60 - 5.52)        | 1.07 - 5.08        | 17%       | 0%         | 0.78          |
|        | day 7      | 100%       | 30.68 (13.59 - 69.25)     | 12.89 - 110.87     | 100%      | 100%       | 13.17         |
|        | day 14     | 100%       | 122.32 (42.79 - 349.62)   | 39.62 - 391.57     | 100%      | 100%       | 52.50         |

<sup>a</sup> in subjects with adequate titers (≥0.5 IU/ml) in international units per milliliter

**Abbreviations:** CI: confidence interval; GMT: geometric mean titer; PrEP: pre-exposure prophylaxis
